# Supplementary material for: Noncoding RNAs: Master Regulator of Fibroblast to Myofibroblast Transition in Fibrosis
Source: MDPI journal article supplement (doi:10.3390/ijms24021801), 2023-01-16
Supplement: s1 [file s1]

Table S1. the potential ncRNA biomarker for FMT.

| Noncoding RNA    | effects             | expression                         | target                                                                                                                                                                                                                          | disease                                                                                                                  | reference                                   |
|------------------|---------------------|------------------------------------|---------------------------------------------------------------------------------------------------------------------------------------------------------------------------------------------------------------------------------|--------------------------------------------------------------------------------------------------------------------------|---------------------------------------------|
| MicroRNA         |                     |                                    |                                                                                                                                                                                                                                 |                                                                                                                          |                                             |
| miR-369-5p       | inhibit             | Down-regulation                    | Over-expression of miR-369-5p decreased the expression of COL1A1 and $\alpha$ -SMA                                                                                                                                              | Myocardial fibrosis                                                                                                      | [117]                                       |
| miR-199a (5p/3p) | promote/<br>inhibit | Up-regulation                      | ① Activate PI3K/AKT/MTOR signaling pathway<br>② Target caveolin-1                                                                                                                                                               | Intimal cord fibrosis/skeletal muscle fibrosis/pulmonary fibrosis                                                        | [118-122]                                   |
| miR-29 (a/b/c)   | inhibit             | Up-regulation /<br>Down-regulation | ① Target VEGF-A<br>② Target Smad7, $\alpha$ -SMA<br>③ Target TPM1                                                                                                                                                               | Corneal fibrosis/high myopia/myocardial fibrosis/pulmonary fibrosis/renal interstitial fibrosis/oral submucosal fibrosis | [26, 36, 38, 74, 102, 116, 123, 124]        |
| miR-129-3p       | promote             | Down-regulation                    | Target Smad3                                                                                                                                                                                                                    | Myocardial fibrosis                                                                                                      | [125]                                       |
| miR-23/27b-3p    | promote             | Up-regulation                      | Target TGF $\beta$ R3, activate TGF- $\beta$ /Smad signaling pathway                                                                                                                                                            | Atrial fibrillation due to myocardial fibrosis                                                                           | [49]                                        |
| miR-21           | promote             | Up-regulation                      | ① Target PDCD4<br>② Affect ADAMTS-1/TGF- $\beta$ signalling pathway, degrade ECM<br>③ Target TGF-R III<br>④ Target Spry<br>⑤ Target PTEN, inhibit p-AKT/P-MTOR<br>⑥ Target smad7<br>⑦ Target jagged1<br>⑧ Target TGF- $\beta$ 2 | Systemic sclerosis/revascularization/myocardial fibrosis/scar/breast cancer                                              | [68, 76, 83, 87, 95, 96, 111, 115, 126-136] |
| miR-146a         | inhibit             | Up-regulation /<br>Down-regulation | ① Target Smad4<br>② Target CXCR4<br>③ Target C0-C1f                                                                                                                                                                             | Diabetic cardiomyopathy/myocardial fibrosis                                                                              | [63, 137]                                   |
| miR-208a         | promote             | Up-regulation                      | Target DYRK2                                                                                                                                                                                                                    | myocardial fibrosis                                                                                                      | [138]                                       |
| miR-let-7b/b/p   | inhibit             | Down-regulation /<br>up-regulation | ① Target IL-8<br>② Target TGFBR1                                                                                                                                                                                                | Breast cancer/pulmonary fibrosis                                                                                         | [24, 42, 139, 140]                          |
| miR-101a         | inhibit             | Down-regulation                    | Target TGF $\beta$ R1                                                                                                                                                                                                           | myocardial fibrosis                                                                                                      | [40]                                        |
| miR-7a/b         | inhibit             | Down-regulation                    | Target Smad2                                                                                                                                                                                                                    | myocardial fibrosis /<br>pulmonary fibrosis                                                                              | [141]                                       |
| miR-214          | inhibit /           | Down-                              | ① Target TGF- $\beta$ 1                                                                                                                                                                                                         | myocardial fibrosis                                                                                                      | [142-144]                                   |

|              |                   |                                 |                                                                                                                                                  |                                                                     |                 |
|--------------|-------------------|---------------------------------|--------------------------------------------------------------------------------------------------------------------------------------------------|---------------------------------------------------------------------|-----------------|
|              | promote           | regulation                      | ② Target TIMP1<br>③ Target NLRC5                                                                                                                 |                                                                     |                 |
| miR-127-3p   | inhibit           | Down-regulation                 | Regulate the expression of MAPK4、COL I / II、 $\alpha$ -SMA                                                                                       | Airway scar                                                         | [88, 145]       |
| miR-34a      | inhibit           | Down-regulation                 | ① Target FLIPS<br>② Target SIRT1<br>③ Target C-ski                                                                                               | Liver fibrosis/pulmonary fibrosis/myocardial fibrosis               | [146-148]       |
| miR-30c/d    | inhibit           | Down-regulation                 | ① Target TGF $\beta$ R II<br>② Target $\alpha$ -ZAP<br>③ Target JAG1                                                                             | myocardial fibrosis / pulmonary fibrosis                            | [46, 110, 149]  |
| miR-145      | promote           | Up-regulation                   | ① Target KLF4<br>② modulate various components of TGF- $\beta$ signaling pathway                                                                 | Pulmonary interstitial fibrosis/myocardial fibrosis                 | [150-158]       |
| miR-126      | inhibit           | Down-regulation                 | ① target DKK<br>② target PIK3R2                                                                                                                  | Rheumatoid arthritis                                                | [75, 159]       |
| miR-335-3p   | inhibit           | Down-regulation                 | target smad2/3                                                                                                                                   | Hereditary gingival fibromatosis                                    | [56]            |
| miR-22       | inhibit           | Down-regulation                 | ① Inhibition of ERK1/2 signaling pathway and negative regulation of CTGF expression<br>② Target CAV3                                             | myocardial fibrosis / pulmonary fibrosis                            | [92, 160]       |
| miR-10a/b    | inhibit / promote | Down-regulation                 | ① Target TGF $\beta$ 1<br>② TWIST can promote the expression of Mir-10b and promote the progression of fibrosis                                  | oral fibrosis/myocardial fibrosis                                   | [161, 162]      |
| miR-155      | promote           | Up-regulation                   | ① Promote the expression of COL I / II、IL-6、IL-1 $\beta$ 、TNF- $\alpha$<br>② Target TP53INP1<br>③ Target AT(1)R, ERK1/2 activation was inhibited | Myocardial fibrosis/intimal vascular fibrosis                       | [91, 163-166]   |
| miR-200a/b/c | inhibit           | Down-regulation                 | ① Inhibit the expression of SIRT1, $\alpha$ -SMA<br>② Target ZEB2<br>③ Target ZEB1                                                               | Myocardial fibrosis/oral submucosal fibrosis/buccal mucosa fibrosis | [113, 114, 167] |
| miR-195      | inhibit / promote | Up-regulation / Down-regulation | Target Check1                                                                                                                                    | Myocardial fibrosis                                                 | [168]           |
| miR-125b     | promote           | Up-regulation                   | ① Target Sirtuin7<br>② Target SFRP5<br>③ Modulate RhoA signaling pathways                                                                        | Liver fibrosis/myocardial fibrosis/aging skin damage                | [169-172]       |
| miR-27a-     | inhibit           | Down-                           | Inhibit the expression of $\alpha$ -SMA、                                                                                                         | myocardial fibrosis                                                 | [52, 64, 103]   |

|            |                   |                                 |                                                                                     |                                                  |            |
|------------|-------------------|---------------------------------|-------------------------------------------------------------------------------------|--------------------------------------------------|------------|
| 3p         |                   | regulation                      | smad2、smad4                                                                         |                                                  |            |
| miR-140    | promote / inhibit | Up-regulation / Down-regulation | Inhibitor TGF- $\beta$ 1signaling pathway                                           | myocardial fibrosis                              | [173]      |
| miR-375    | inhibit           | Down-regulation                 | Target P38                                                                          | pulmonary fibrosis                               | [174]      |
| miR-327    | promote           | Down-regulation                 | -                                                                                   | myocardial fibrosis                              | [175]      |
| miR-133a   | inhibit           | Down-regulation                 | ① Target Furin<br>② Target TGFBR1 , inhibit the expression of CTGF、COL I $\alpha$ 1 | Thoracic aortic aneurysm / pulmonary fibrosis    | [176, 177] |
| miR-144    | inhibit           | Down-regulation                 | Target CREB                                                                         | myocardial fibrosis                              | [178]      |
| miR-210-5p | inhibit           | Up-regulation                   | Target STAT5A                                                                       | Fibrosis of skin                                 | [107]      |
| miR-192    | promote           | Up-regulation                   | Target SIP1 (Smad interacting protein)                                              | Hypertrophy scar fibrosis                        | [179]      |
| miR-574-5p | promote           | Up-regulation                   | Target ARID3A                                                                       | myocardial fibrosis                              | [180]      |
| miR-127-3p | promote           | Up-regulation                   | -                                                                                   | Myofibroblast senescence phenotype               | [88]       |
| miR-152-3p | inhibit           | Down-regulation                 | Inhibit wnt1/ $\beta$ -catenin signaling pathway                                    | myocardial fibrosis                              | [181]      |
| miR-370    | inhibit           | Up-regulation                   | Inhibit the expression of TGF-R2/sm3                                                | myocardial fibrosis                              | [47]       |
| miR-130    | inhibit / promote | Down-regulation / up-regulation | ① Target TGF $\beta$ R1<br>② Target peroxidase                                      | myocardial fibrosis                              | [41, 182]  |
| miR-218    | promote           | Down-regulation                 | Target Cezanne ( deubiquitinating enzymes)                                          | Gingival fibroblasts                             | [183]      |
| miR-26     | inhibit           | Down-regulation                 | ① Modulate TGF- $\beta$ signaling pathway<br>② Target Keap1                         | Pulmonary artery hypertrophy/myocardial fibrosis | [184, 185] |
| miR-33a-3p | inhibit           | Up-regulation                   | Target DKK-1                                                                        | Systemic sclerosis                               | [100]      |
| miR-338-3p | inhibit           | Down-regulation                 | ①Target FGFR2<br>②Target PTEN                                                       | myocardial fibrosis                              | [77, 90]   |
| miR-154    | promote           | Up-regulation                   | Target DKK2                                                                         | myocardial fibrosis                              | [101]      |
| miR-150    | inhibit           | Up-regulation                   | Modulate the expression of c-myb                                                    | myocardial fibrosis                              | [186, 187] |
| miR-541-5p | inhibit           | Down-regulation                 | Modulate the expression of PDE1A                                                    | pulmonary fibrosis                               | [188]      |
| miR-1246   | promote           | Up-regulation                   | Might target COL I                                                                  | Oral submucosal fibrosis                         | [189]      |
| miR-216a   | promote           | Up-regulation                   | target PTEN                                                                         | Renal fibrosis                                   | [190]      |

|                               |         |                 |                                                                                                                                                                                                                                                                      |                                          |                       |
|-------------------------------|---------|-----------------|----------------------------------------------------------------------------------------------------------------------------------------------------------------------------------------------------------------------------------------------------------------------|------------------------------------------|-----------------------|
| miR-16-5p                     | inhibit | Down-regulation | Inhibit NOTCH signaling pathway                                                                                                                                                                                                                                      | Systemic sclerosis                       | [109]                 |
| miR-497                       | promote | Up-regulation   | -                                                                                                                                                                                                                                                                    | Oral submucosal fibrosis                 | [191]                 |
| miR-433                       | promote | Up-regulation   | ① Target AZIN1, repress TGF- $\beta$ 1;<br>② Target JNK1                                                                                                                                                                                                             | myocardial fibrosis                      | [23]                  |
| miR-9-5p                      | inhibit | Down-regulation | Target TGF $\beta$ R2                                                                                                                                                                                                                                                | Fibrosis of the human dermis             | [43, 48, 192]         |
| miR-375                       | inhibit | Down-regulation | Target FOXF1                                                                                                                                                                                                                                                         | Fibrosis of mucosa                       | [193]                 |
| miR-122                       | inhibit | Down-regulation | Target FN1                                                                                                                                                                                                                                                           | Liver fibrosis                           | [194]                 |
| miR-503                       | inhibit | Down-regulation | Target VEGFA、FGFR1                                                                                                                                                                                                                                                   | pulmonary fibrosis                       | [78]                  |
| miR-449                       | inhibit | Down-regulation | Target PLOD1                                                                                                                                                                                                                                                         | Skin scar                                | [195]                 |
| miR-320                       | promote | Up-regulation   | Activate PI3CA/AKT/MTOR signaling pathway                                                                                                                                                                                                                            | myocardial fibrosis                      | [196]                 |
| miR-32-5p                     | promote | Up-regulation   | Target DUSP1                                                                                                                                                                                                                                                         | myocardial fibrosis                      | [89]                  |
| miR-424                       | promote | Up-regulation   | Target Slit2                                                                                                                                                                                                                                                         | pulmonary fibrosis                       | [197]                 |
| miR-877-3p                    | inhibit | Down-regulation | Target Smad7                                                                                                                                                                                                                                                         | myocardial fibrosis                      | [69]                  |
| miR-192-5p                    | inhibit | Up-regulation   | Target IL-17RA , modulate Smad signaling pathway                                                                                                                                                                                                                     | Fibrosis of scar                         | [198]                 |
| Circular RNA                  |         |                 |                                                                                                                                                                                                                                                                      |                                          |                       |
| circHIPK3                     | promote | Up-regulation   | ① Competitive binding with mir-338-3p promotes the expression of SOX4 and COL1A1<br>② Competitive binding with mir-30-3p promotes the expression of FOXK2 and promotes glycolysis<br>③ Competitive binding with miR-152-3p promotes the expression of TGF- $\beta$ 2 | pulmonary fibrosis / myocardial fibrosis | [22, 31, 32, 199-202] |
| Mmu-circ-0005019/circ-0099734 | inhibit | Down-regulation | Competitive binding with miR-499-5p promotes the expression of kcdn1/kcdn3/scn5a/kcnn3                                                                                                                                                                               | myocardial fibrosis                      | [203]                 |
| circAMD1                      | inhibit | Down-regulation | Competitive binding with miR-27a-3p inhibits functional and phenotypic changes in p63 mutant human dermal fibroblasts                                                                                                                                                | p63 mutant human dermal fibroblasts      | [53]                  |
| circNLgn                      | promote | Up-regulation   | NLgn173 binds to laminB1 and localizes it to the nucleus. NLgn173 binds to the ING4 and C8orf44GSK3 promoters,                                                                                                                                                       | Myocardial remodeling                    | [204]                 |

|                                 |         |                 |                                                                                                                                                                                                    |                                           |       |
|---------------------------------|---------|-----------------|----------------------------------------------------------------------------------------------------------------------------------------------------------------------------------------------------|-------------------------------------------|-------|
|                                 |         |                 | resulting in abnormal deposition of collagen and class switching of fibroblasts.                                                                                                                   |                                           |       |
| circ0044226                     | promote | Up-regulation   | Competitive binding with miR-7 promotes sp1 expression                                                                                                                                             | pulmonary fibrosis                        | [205] |
| circCUL2                        | promote | Up-regulation   | Competitive binding with miR-203a-3p activates MYD88/NF- $\kappa$ B pathway to transform pancreatic fibroblasts into cancer-associated fibroblasts, and secretes IL-6 to promote PDAC progression. | Double adenocarcinoma of pancreas         | [206] |
| circfgfr2                       | promote | Up-regulation   | Competitive binding with miR-133 promotes the expression of MAP3K20/JNK/MAPK/KLF4, while KLF4 can bind to the circFgfr2 promoter to promote the expression of circFgfr2                            | Muscle regeneration                       | [97]  |
| circ-010567                     | promote | Up-regulation   | competitively binds with miR-141 and promotes the expression of TGF- $\beta$                                                                                                                       | myocardial fibrosis                       | [207] |
| circ-SCAR                       | inhibit | Down-regulation | Direct binding to ATP5B inhibits mitochondrial mROS output and class transformation in fibroblasts                                                                                                 | Non-alcoholic steatohepatitis             | [208] |
| circHECTD1                      | promote | Up-regulation   | Competitive binding with miR-142-3p promotes the expression of HMGB1, and then activates TGF- $\beta$ /Smad pathway                                                                                | Hypertrophic scar                         | [209] |
| circ-EP400                      | promote | Up-regulation   | deriving from M2 macrophages exosomes competitively bind to miR-15b-5p and promote the expression of FGF1/7/9                                                                                      | Tendon injuries                           | [94]  |
| circ-HNRNP1                     | inhibit | Up-regulation   | Competitive binding with miR-216-5p promotes smad7 expression and then promote TGF- $\beta$ 1 degradation                                                                                          | Myocardial fibrosis occurs after ischemia | [70]  |
| circ-0047339                    | promote | Up-regulation   | Competitive binding with miR-4691-5p promotes the expression of TSP-1(an endogenous activator of TGF- $\beta$ )                                                                                    | Urethral scar fibrosis                    | [210] |
| Mmu-circ-37492/has-circ-0012138 | inhibit | Up-regulation   | Competitive binding with miR-7682-3p promotes the expression of FGB                                                                                                                                | Renal fibrosis                            | [211] |
| lncRNA                          |         |                 |                                                                                                                                                                                                    |                                           |       |
| TUG1                            | promote | Up-regulation   | Activate TGF- $\beta$ /Smad signaling pathway                                                                                                                                                      | Human periodontal membrane fibroblasts    | [39]  |
| DNM3OS                          | promote | Up-regulation   | ① Activate TGF- $\beta$ /Smad signaling pathway<br>② Competitive binding of miR-199a-                                                                                                              | myocardial fibrosis / pulmonary fibrosis  | [212] |

|                  |         |                                                               |                                                                                                                                                                                                                                     |                                                |                              |
|------------------|---------|---------------------------------------------------------------|-------------------------------------------------------------------------------------------------------------------------------------------------------------------------------------------------------------------------------------|------------------------------------------------|------------------------------|
|                  |         |                                                               | 5p activates TGF- $\beta$ signaling pathway                                                                                                                                                                                         |                                                |                              |
| Fendrr           | inhibit | Down-regulation                                               | Binding to DNMT3B (DNA methyltransferase) promotes methylation of RASSF1A (RAS-associated region family 1A gene)                                                                                                                    | myocardial fibrosis                            | [93]                         |
| MEG3             | inhibit | Down-regulation                                               | -                                                                                                                                                                                                                                   | myocardial fibrosis                            | [213]                        |
| n341773          | inhibit | Down-regulation                                               | Inhibit PI3K/AKT/mTOR signaling pathway                                                                                                                                                                                             | pulmonary fibrosis                             | [80]                         |
| MIR155HG         | promote | Up-regulation                                                 | Competitive binding of miR-627 promotes the expression of HMGB1                                                                                                                                                                     | pulmonary fibrosis                             | [214]                        |
| GAS5             | inhibit | Down-regulation                                               | ① Might competitively binding of miR-21<br>② inhibits the expression of p-Smad and $\alpha$ -SMA<br>③ binds smad3, promotes the binding of smad3 to PPM1A (protein phosphatase 1A), and dephosphorylates smad3                      | myocardial fibrosis / Oral submucosal fibrosis | [54, 58-60, 82, 84, 215-218] |
| ASLNCS5088       | promote | Up-regulation                                                 | Derived from M2 macrophage exosomes, it competitively binds miR-200c-3p and promotes GLS (glutaminase) and $\alpha$ -SMA expression                                                                                                 | Hypertrophic scar                              | [219]                        |
| HOTAIR           | promote | Up-regulation                                                 | Through H3K27me3-mediated activation of notch signaling pathway to induce FMT/ directed EZH2 (histone methyltransferase) can induce specific target gene H3K27me3, inhibit miR-34a expression, and activate NOTCH signaling pathway | Systemic sclerosis                             | [112, 220]                   |
| CTD-2528L19.6    | inhibit | Early stage: Up-regulation<br>Advanced stage: Down-regulation | Down-regulate fibrosis-related genes LRRC8C, DDIT4, THBS1, S100A8 and TLR7                                                                                                                                                          | Idiopathic pulmonary fibrosis                  | [221]                        |
| ZFAS1            | promote | Up-regulation                                                 | Competitive binding of miR-150-5p promotes SLC38A1 expression                                                                                                                                                                       | pulmonary fibrosis                             | [222]                        |
| Cfast (AK048087) | promote | Up-regulation                                                 | Binding to COTL1, competitively inhibits COTL1 interaction with TRAP1 (transforming factor receptor- $\beta$ -associated protein 1), which enhances smad2/4 complex formation and TGF- $\beta$ signaling                            | myocardial fibrosis                            | [223]                        |

|                       |         |                 |                                                                                                                                                                                                                                                                                       |                                               |           |
|-----------------------|---------|-----------------|---------------------------------------------------------------------------------------------------------------------------------------------------------------------------------------------------------------------------------------------------------------------------------------|-----------------------------------------------|-----------|
| PFL(NONM MUT02255 5)  | promote | Up-regulation   | Competitive binding of let-7d promotes the expression of PTAFR (platelet activating factor)                                                                                                                                                                                           | myocardial fibrosis                           | [224]     |
| Safe ( AK 137033)     | promote | Up-regulation   | The RNA binding protein can be combined with the adjacent gene sfrp2 mRNA and lncRNA safe complex                                                                                                                                                                                     | Myocardial injury in rats                     | [105]     |
| PFAL (MONMM UT021928) | promote | Up-regulation   | Competitive binding of miR-18a promotes the expression of CTGF                                                                                                                                                                                                                        | pulmonary fibrosis                            | [81]      |
| Rian                  | inhibit | Down-regulation | Over-expression of Rian or downregulation of Miat could reduce the expression of $\alpha$ -SMA, COLA1 and smad2/3                                                                                                                                                                     | Renal fibrosis                                | [225]     |
| Miat                  | promote | Up-regulation   |                                                                                                                                                                                                                                                                                       |                                               |           |
| TUG1                  | promote | Up-regulation   | Competitively bind of miR-29c                                                                                                                                                                                                                                                         | myocardial fibrosis                           | [39]      |
| H19                   | promote | Up-regulation   | Derived from M2 macrophages, it competitively binds let-7a/ competitively binds miR-29b to promote cola1 expression                                                                                                                                                                   | pulmonary fibrosis / Oral submucosal fibrosis | [37, 226] |
| NEAT1                 | promote | Up-regulation   | Competitive binding of miR-760 promotes the expression of TPM1                                                                                                                                                                                                                        | Oral submucosal fibrosis                      | [227]     |
| IAPF                  | promote | Up-regulation   | H3K27ac activates the IAPF promoter, ATF3 binds to the IAPF promoter, IAPF transcription is enhanced, and it forms RNA-protein complex with ELAVL1/HUR, inhibits the fusion of autophagosomes and lysosomes, and controls the stability of EZH2, STAT1 and FOXK1 to inhibit autophagy | pulmonary fibrosis                            | [228]     |
| LOC103691771          | promote | Up-regulation   | Activate TGF- $\beta$ -Smad2/3 signaling pathway                                                                                                                                                                                                                                      | silicosis                                     | [229]     |
| SNHG7                 | promote | Up-regulation   | Competitive binding of miR-34-5p promotes ROCK1 expression                                                                                                                                                                                                                            | Myocardial remodeling                         | [230]     |
| HOTTIP                | promote | Up-regulation   | Promote the expression of $\alpha$ -SMA、COLI、IL-6、TNF- $\alpha$                                                                                                                                                                                                                       | myocardial fibrosis                           | [231]     |
| SNHG1                 | promote | Up-regulation   | Competitive binding of miR-326 promoted the expression of SP1                                                                                                                                                                                                                         | pulmonary fibrosis                            | [232]     |
| LINC01518             | promote | Up-regulation   | Competitively binds of miR-216b-5p                                                                                                                                                                                                                                                    | glaucoma                                      | [233]     |
| CRNDE                 | inhibit | Up-regulation   | Smad3 promotes CRNDE, while CRNDE inhibits smad3 transcriptional activation of target genes                                                                                                                                                                                           | Diabetic myocarditis                          | [55]      |
| LINC00312             | promote | Up-regulation   | The expression of $\alpha$ -SMA and p-Smad was promoted by YBX1                                                                                                                                                                                                                       | Oral submucosal fibrosis                      | [234]     |
| SNHG20                | promote | Up-regulation   | Competitive binding of miR-490-3p promotes the expression of TGFBR1                                                                                                                                                                                                                   | silicosis                                     | [45]      |

|           |         |                     |                                |                  |       |
|-----------|---------|---------------------|--------------------------------|------------------|-------|
| LINC00963 | inhibit | Down-<br>regulation | Competitively binds miR-143-3p | Corneal fibrosis | [235] |
|-----------|---------|---------------------|--------------------------------|------------------|-------|
